# Supplementary material for: Doxycycline transformation and emergence of antibacterially active products during water disinfection with chlorine
Source: Royal Society of Chemistry journal article supplement (doi:10.1039/c7ew00215g), 2017-01-01
Supplement: c7ew00215g1.pdf [file c7ew00215g1.pdf]

### Supplementary Data

Doxycycline transformation and emergence of antibacterially active products during  
water disinfection with chlorine

Nicole Kennedy Neth<sup>a</sup>, Clifford M. Carlin<sup>b</sup> and Olya S. Keen<sup>a,#</sup>

<sup>a</sup>University of North Carolina at Charlotte, Department of Civil and Environmental  
Engineering

<sup>b</sup>University of North Carolina at Charlotte, Department of Chemistry

<sup>#</sup>corresponding author: okeen@uncc.edu, 704-687-5048

9201 University City Blvd, EPIC 3355

Charlotte, NC 28223

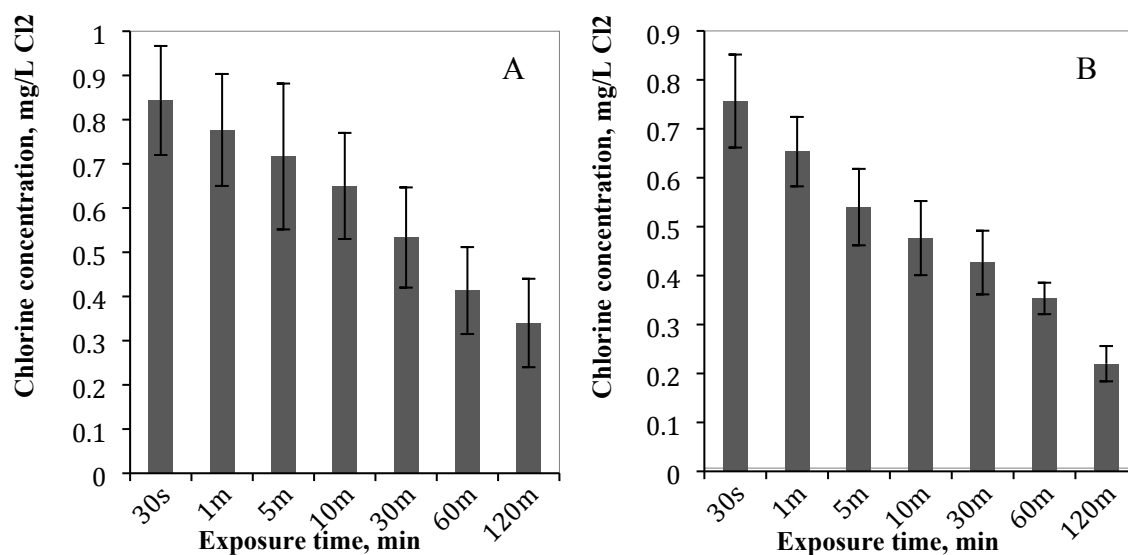

Figure S1. Chlorine concentration over time in ultrapure water (A) and wastewater (B). Results are based on three sets of replicated data. Error bars represent the standard deviation from three repeated experiments.

| Transformation Product | Major Fragment   | Proposed Structure of Fragment                                                      | Minor Fragment     | Proposed Structure of Fragment                                                        |
|------------------------|------------------|-------------------------------------------------------------------------------------|--------------------|---------------------------------------------------------------------------------------|
| 417                    | 400 <sup>1</sup> | 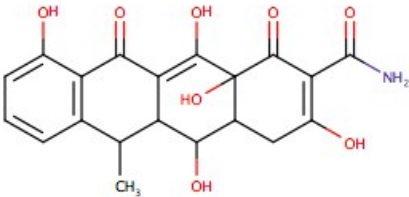   | -                  | -                                                                                     |
| 451                    | 433 <sup>2</sup> | 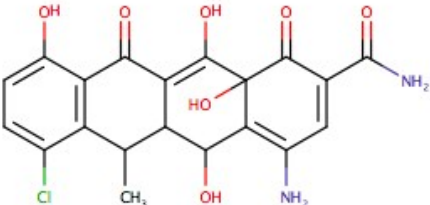   | -                  | -                                                                                     |
| 479                    | 349 <sup>1</sup> | 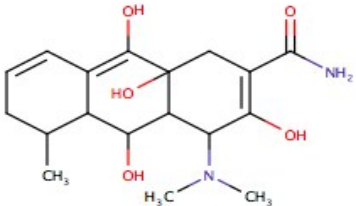  | 312 <sup>1,3</sup> | 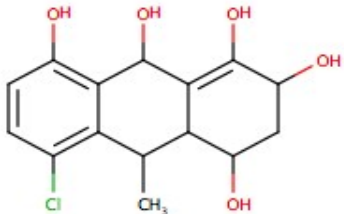  |
| 513                    | 468 <sup>4</sup> | 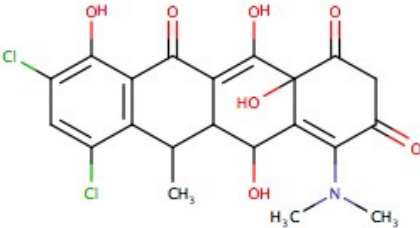 | 260                | 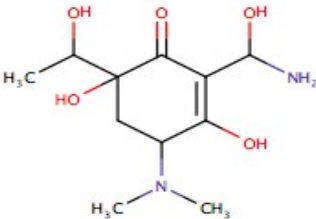 |
| 547                    | 303 <sup>2</sup> | 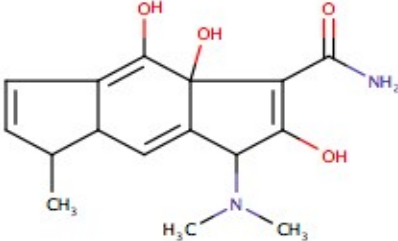 | 511 <sup>4</sup>   | 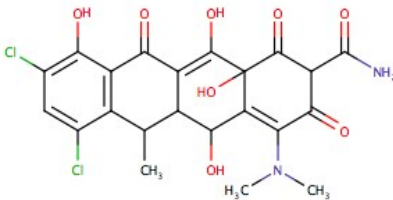 |

Figure S2. Proposed transformation products with corresponding MS/MS fragments and proposed major/minor structures.

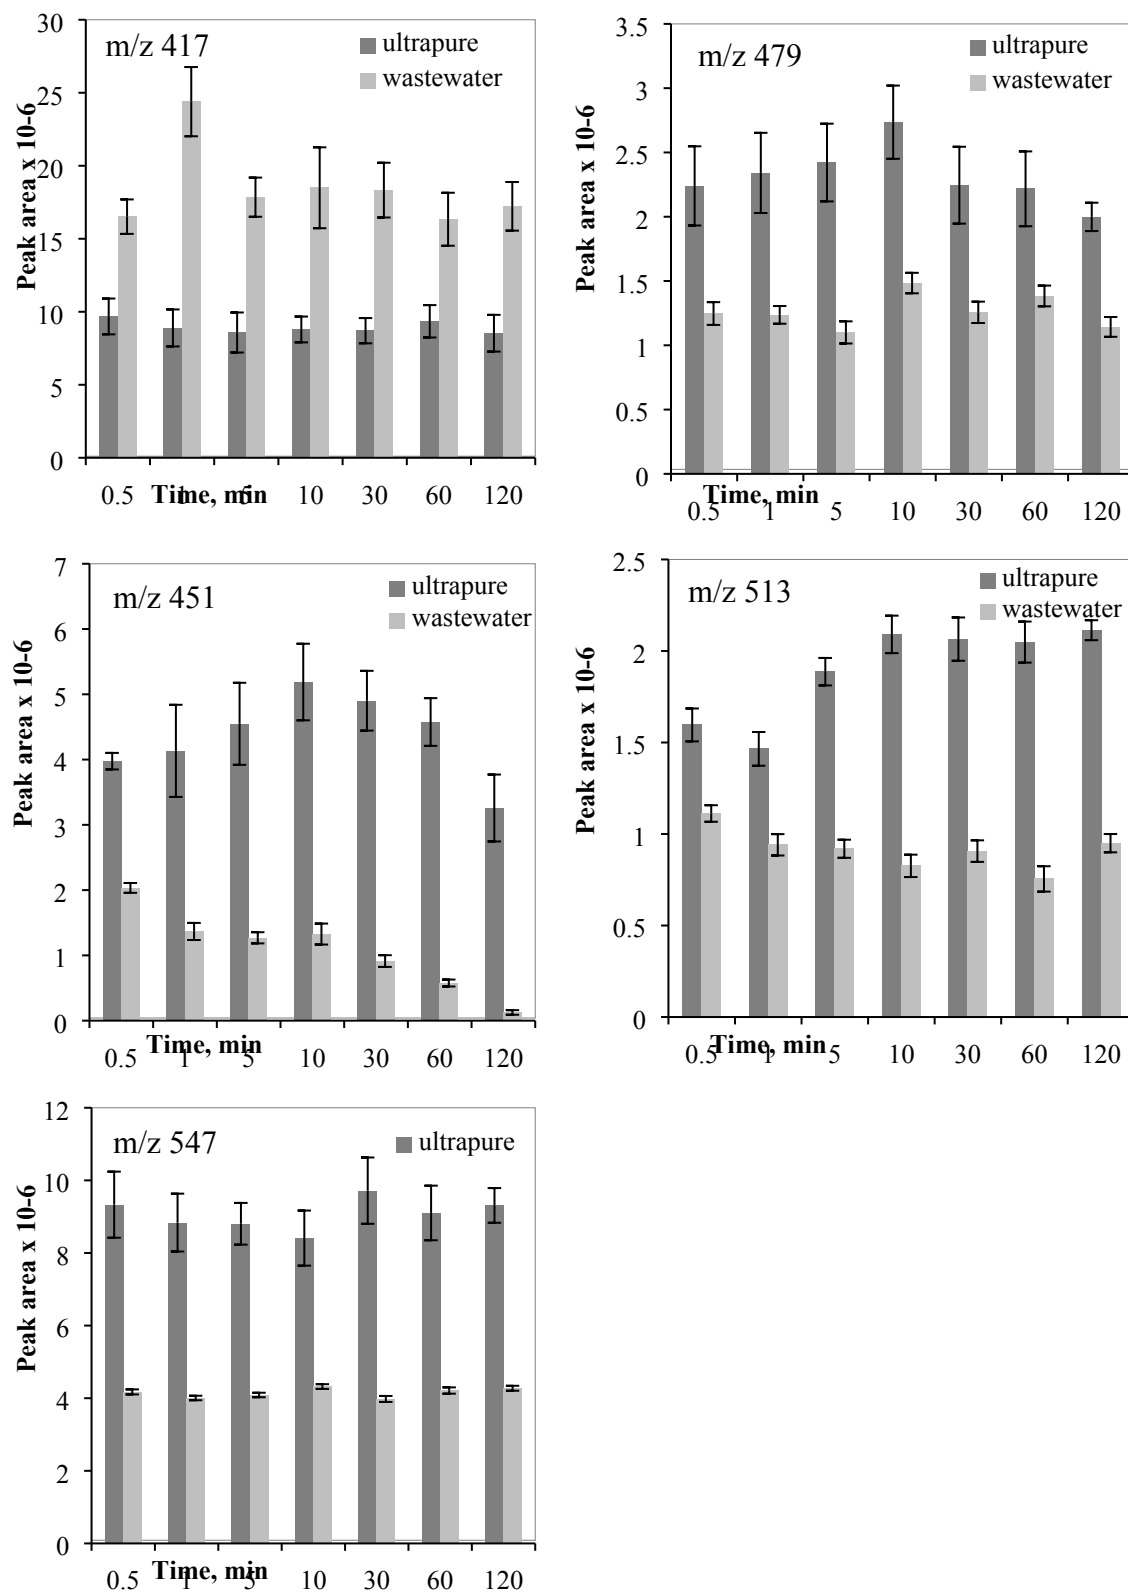

Figure S3. Transformation product mass spectrum peak area over time. Results are based on three sets of replicated data. Error bars represent the standard deviation from three repeated experiments.

## **References:**

1. Li, Z.; Fenet, H.; Gomez, E.; Chiron, S., Transformation of the antiepileptic drug oxcarbazepine upon different water disinfection processes. *Water research* **2011**, 45 (4), 1587-1596.
2. Vartanian, V. H.; Goolsby, B.; Brodbelt, J. S., Identification of tetracycline antibiotics by electrospray ionization in a quadrupole ion trap. *Journal of the American Society for Mass Spectrometry* **1998**, 9 (10), 1089-1098.
3. Gudaganatti, M. S.; Hanagadakar, M. S.; Kulkarni, R. M.; Malladi, R. S.; Nagarale, R. K., Transformation of levofloxacin during water chlorination process: kinetics and pathways. *Progress in Reaction Kinetics and Mechanism* **2012**, 37 (4), 366-382.
4. Buth, J. M.; Ross, M. R.; McNeill, K.; Arnold, W. A., Reprint of: Removal and formation of chlorinated triclosan derivatives in wastewater treatment plants using chlorine and UV disinfection. *Chemosphere* **2011**, 85 (2), 284-289.
